# Supplementary material
Source: Springer Nature journal article supplement (https://www.springermedizin.de/resource/supplementary/12906_2001_15_MOESM4_ESM.pdf/9523840)

## Treatment groups

Placebo

Diclofenac

EA

Combined

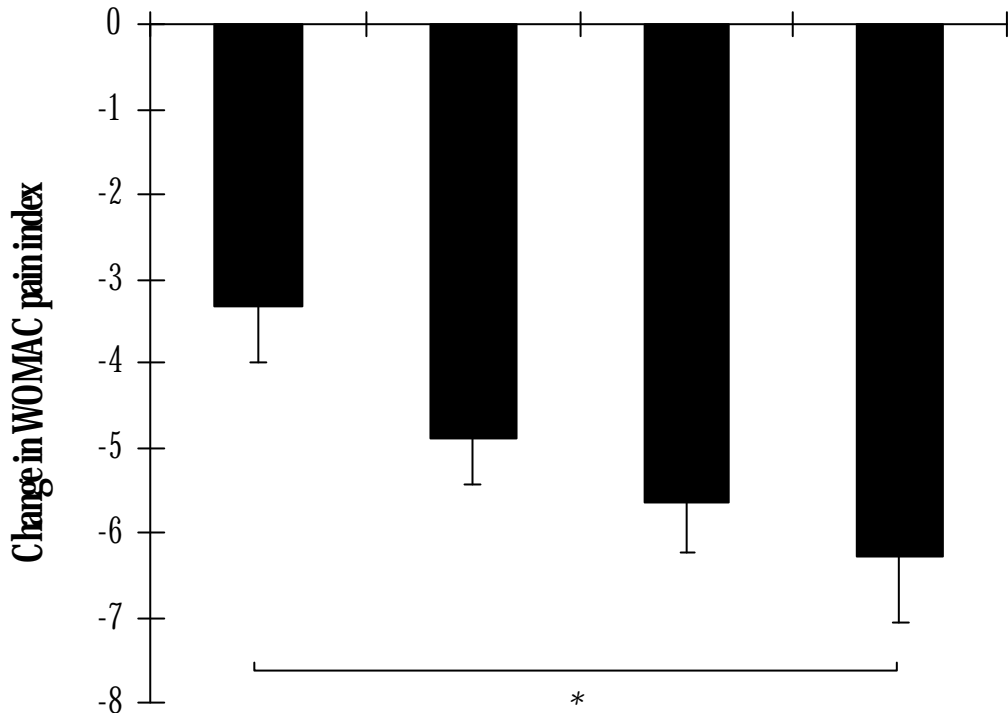

Supplement: MOESM4 [file 9523840]
